# Supplementary material for: Hand Fine Motor Skill Disability Correlates with Cognition in Patients with Moderate-to-Advanced Parkinson’s Disease
Source: MDPI journal article supplement (doi:10.3390/brainsci10060337), 2020-06-02
Supplement: s1 [file s1]

# Supplementary Materials: Hand Fine Motor Skill Disability Correlates with Cognition in Patients with Moderate-to-Advanced Parkinson's Disease

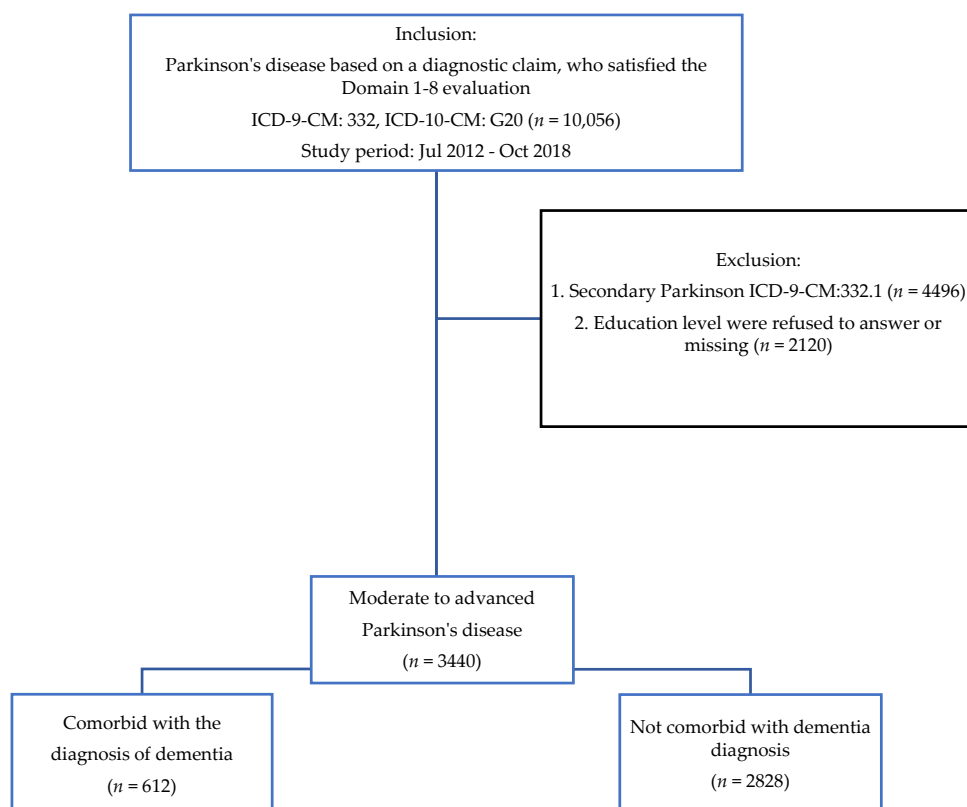

**Figure S1.** Patient selection process

**Table S1.** Items of the eight domains of the Functioning Scale of the Disability Evaluation System-Adult Version.

| Domains                                 | Items and labels                                                                                                                                             |
|-----------------------------------------|--------------------------------------------------------------------------------------------------------------------------------------------------------------|
| Do1 Cognition<br>(6 items) <sub>a</sub> | D1.1 Concentration<br>D1.2 Remembering to do important things<br>D1.3 Problem-solving<br>D1.4 Learning a new task<br>D1.5 Understanding<br>D1.6 Conversation |
| Do2 Mobility<br>(5 items) <sub>a</sub>  | D2.1 Standing for long periods<br>D2.2 Standing up from sitting<br>D2.3 Moving around inside home<br>D2.4 Getting out of home                                |
| Do3 Self-care<br>(4 items) <sub>a</sub> | D3.1 Washing whole body<br>D3.2 Getting dressed<br>D3.3 Eating<br>D3.4 Staying by self for a few days                                                        |

|                                                                             |                                                                                                                                                                                                                                                                                                                                                                                     |
|-----------------------------------------------------------------------------|-------------------------------------------------------------------------------------------------------------------------------------------------------------------------------------------------------------------------------------------------------------------------------------------------------------------------------------------------------------------------------------|
| Do4 Getting along<br>(5 items) <sup>a</sup>                                 | D4.1 Dealing with strangers<br>D4.2 Maintaining a friendship<br>D4.3 Getting along with people close to<br>D4.4 Making new friends<br>D4.5 Sexual activities                                                                                                                                                                                                                        |
| Do5 Life activities<br>Do5.1 Household<br>activities (4 items) <sup>a</sup> | D5.1 Household responsibilities<br>D5.2 Do important household tasks well<br>D5.3 Do all needed household work<br>D5.4 Household work performed as quickly as needed                                                                                                                                                                                                                |
| Do5.2<br>Work or school<br>activities (4 items) <sup>a</sup>                | D5.5 Day-to-day work/school<br>D5.6 Do important work/school tasks well<br>D5.7 Getting done all needed work<br>D5.8 Work performed as quickly as needed                                                                                                                                                                                                                            |
| Do6 Participation<br>(8 items) <sup>a</sup>                                 | D6.1 Joining in community activities<br>D6.2 Because of environmental barriers<br>D6.3 Others affects one's dignity<br>D6.4 Health affects time consumption<br>D6.5 Health affects one's emotion<br>D6.6 Health affects family finances<br>D6.7 Health affects family Not linkable (impact question)<br>D6.8 Doing things for relaxation or pleasure                                |
| Do7 Environmental<br>attributes (8 items) <sup>c</sup>                      | D7.1 Food and drugs for personal consumption<br>D7.2 Products and technology for personal use in daily living<br>D7.3 Products and technology for personal indoor and outdoor mobility and transportation<br>D7.4 Products and technology for communication<br>D7.5 Products and technology for education<br>D7.6 Financial assets<br>D7.7 Climate<br>D7.8 Social security services |
| Do8 Motor action<br>(7 items) <sup>b</sup>                                  | D8.1 Pick up a pen<br>D8.2 Button up<br>D8.3 Tie something<br>D8.4 Stand up from chair sitting<br>D8.5 Bend down to pick something up<br>D8.6 Walk for 3 m and return<br>D8.7 Sit onto the chair                                                                                                                                                                                    |

One extra item is used to ask about having assistive devices or personal assistance in daily life in Domains 1-6 and Domain 8. Two extra items are used to ask about the health impacts on working and salary in each dimension of Domain 6; a, Each item has performance and capability dimensions through interviewing, scoring 0-4 for level of difficulty (rated as follows: 0 = no difficulty; 1 = slight; 2=medium; 3 = high; 4 = extremely high or unable and 9 for not applicable.); b, Each item has a capability dimension through interviewing, scoring 0-4 for degree of personal assistance with usual devices, and each item has a capacity dimension through direct testing without mobility devices, scoring 0-4 (0 = no assistance; 1 =supervision or verbal cue; 2 = a little physical assistance; 3 = lots of physical assistance; 4 = complete physical assistance); c, Through interviewing, dichotomy score: 0 = no environmental barrier or open access; 1 = encounter environmental barrier.

**Table S2.** Multivariate logistic regression models for the association between the different hand fine motor skills and presence of dementia after adjustments for age, sex, and the Hoehn and Yahr stage of Parkinson's disease.

|             | $\beta$ | Odds ratio | 95% Confidence index |       | p value |
|-------------|---------|------------|----------------------|-------|---------|
| Pen-holding | 0.125   | 1.133      | 1.055                | 1.217 | 0.001   |
| Buttoning   | 0.040   | 1.041      | 0.974                | 1.112 | 0.235   |
| Knotting    | 0.095   | 1.099      | 1.030                | 1.173 | 0.004   |

**Table S3.** Distribution of hand fine motor skill disabilities among patient age groups.**(A) PD patients less than 75 years old.**

|               | PDD | Non-PDD |
|---------------|-----|---------|
| Disability    | 117 | 884     |
| No Disability | 66  | 565     |

Sensitivity of detecting dementia by the presence of disability with had fine motor skills = 63.9%; Abbreviation: Parkinson's disease dementia (PDD), non- Parkinson's disease dementia (non-PDD)

**(B) PD patients 75 years old and above.**

|               | PDD | Non-PDD |
|---------------|-----|---------|
| Disability    | 328 | 1000    |
| No Disability | 101 | 379     |

Sensitivity of detecting dementia by the presence of disability with had fine motor skills =76.5%; Abbreviation: Parkinson's disease dementia (PDD), non- Parkinson's disease dementia (non-PDD)

**Table S4.** Multivariate logistic regression models for association between hand fine motor skill disabilities and cognitive disability after adjustments for age, sex, and the Hoehn and Yahr stage of Parkinson's disease.

|                                  | $\beta$ | Odds Ratio | 95% Confidence Index |       | <i>p</i> Value |
|----------------------------------|---------|------------|----------------------|-------|----------------|
| Intercept                        | -0.455  |            |                      |       | <0.001         |
| Gender(ref = Male)               |         |            |                      |       |                |
| Female                           | -0.214  | 0.807      | 0.683                | 0.955 | 0.012          |
| Age (ref $\leq$ 75)              |         |            |                      |       |                |
| 75 years & above                 | 0.187   | 1.206      | 1.015                | 1.433 | 0.034          |
| Hoehn-Yahr Stage (ref = Stage 3) |         |            |                      |       |                |
| Stage 4                          | 0.422   | 1.524      | 1.277                | 1.820 | <0.001         |
| Stage 5                          | 1.230   | 3.420      | 2.472                | 4.733 | <0.001         |
| Cognition                        | 0.206   | 1.229      | 1.187                | 1.272 | <0.001         |

Cognitive disability was classified on a 10-point scale.
